# Supplementary material
Source: PubMed Central journal article supplement (PMC2884005)
Supplement: NIHMS202389-supplement-01.pdf [file NIHMS202389-supplement-01.pdf]

## SUPPLEMENTARY INFORMATION

# Identification of Viridicatumtoxin and Griseofulvin Gene Clusters from *Penicillium aethiopicum*

Yit-Heng Chooi, Ralph Cacho, and Yi Tang\*

Department of Chemical and Biomolecular Engineering

University of California, Los Angeles

420 Westwood Plaza, Los Angeles, CA 90095

\*Correspondence: [yitang@ucla.edu](mailto:yitang@ucla.edu)

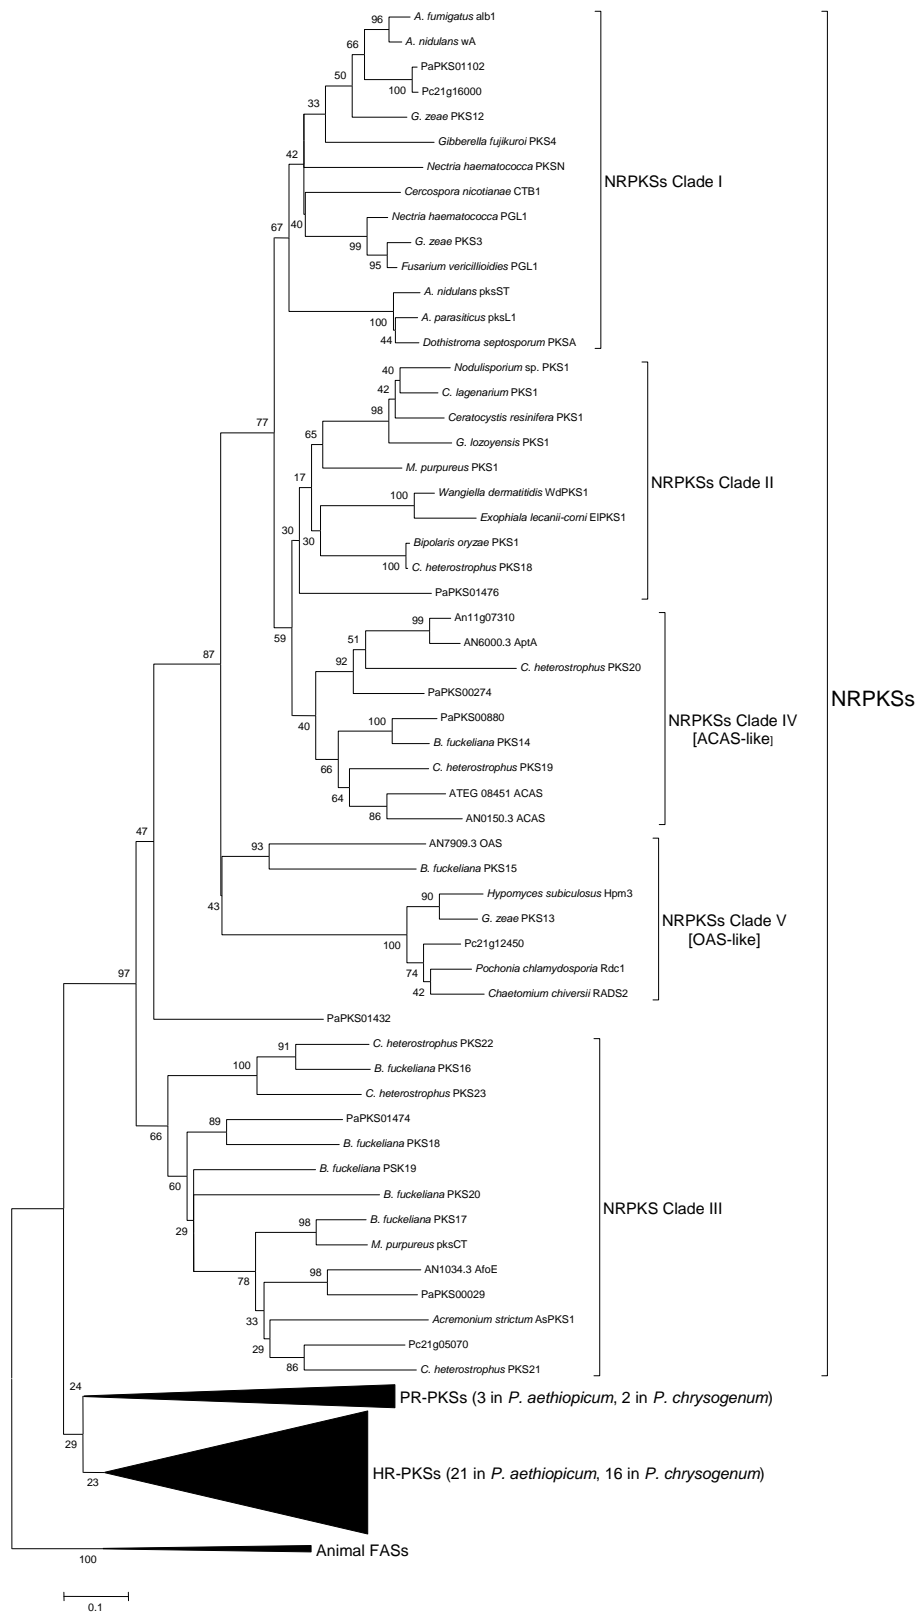

**Figure S1.** The KS domain phylogeny inferred using the Minimum Evolution method (bootstrap replicates = 500). The clades for PR-PKSs, HR-PKSs and animal FASs were compressed (not shown). Assignment of NRPKSs clade I, II and III is based on Kroken et al. (2003). Two NRPKS clades (previously grouped as NRPKSs basal to clade I and II) were assigned as Clade IV (ACAS-like) and V (OAS-like), based on their recently characterized function.

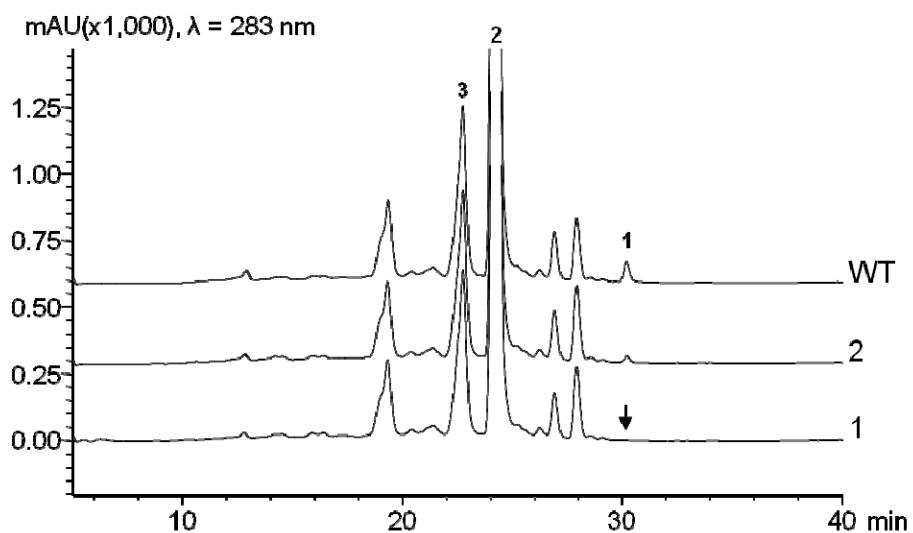

**Figure S2.** RNA-silencing of *vrtA* (PaPKS0274). Transformants PKS274si-2 showed reduced production of **1**, while production of **1** is completely abolished in PKS274si-1.

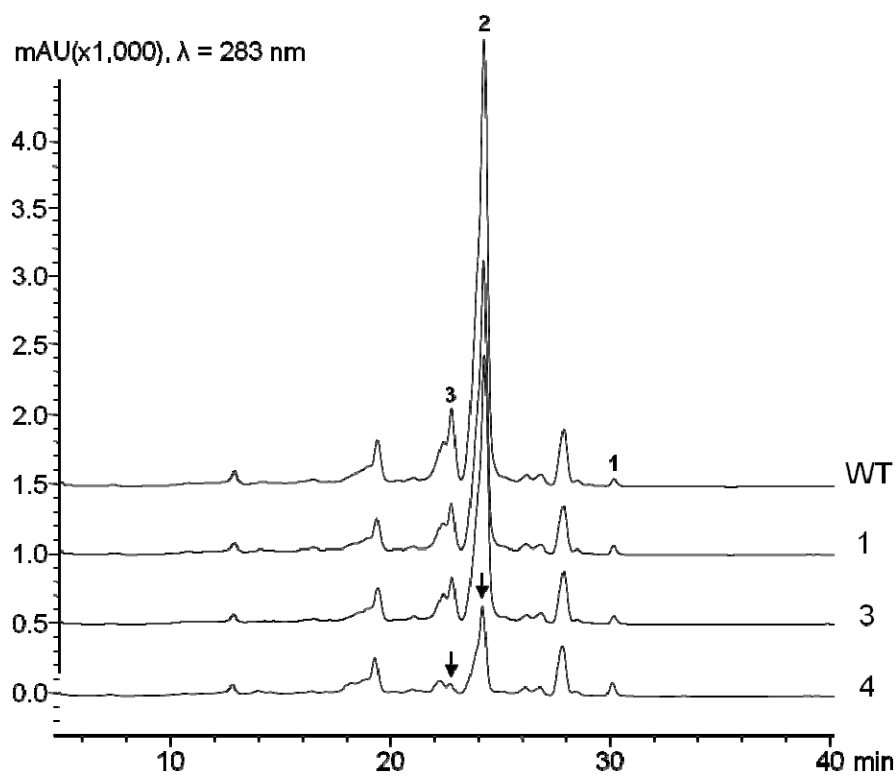

**Figure S3.** RNA-silencing of *gsfA* (PaPKS0880). Transformants PKS880si-1 and -3 have lower **2** and **3** levels than *WT*, while PKS880si-4 has the lowest level of **2** and **3** among all the RNA-silencing transformants.

**Table S1.** Domain architectures of putative PKSs in *P.aethiopicum* and comparison to the closest homologs in *P. chrysogenum* and other fungi. Highlighted rows indicate *P. aethiopicum* PKS genes that have an ortholog in *P. chrysogenum*.

| Contig No. | PKS Gene ID      | length (a.a.) | PKS domains                | PKS clades  | Closest homolog in BlastP |
|------------|------------------|---------------|----------------------------|-------------|---------------------------|
| 1          | 00274 PaPKS0274  | 1824          | SAT-KS-AT-PT-ACP           | NR-PKS      | NFIA_112240, 63%          |
| 2          | 01102 PaPKS1102  | 2138          | SAT-KS-AT-PT-ACP-TE        | NR-PKS      | Pc21g16000, 96%           |
| 3          | 00880 PaPKS0880  | 1797          | SAT-KS-AT-PT-ACP           | NR-PKS      | BC1G_08227, 61%           |
| 4          | 01476 PaPKS1476  | 2146          | SAT-KS-AT-PT-ACP-TE        | NR-PKS      | PODANSg8506, 56%          |
| 5          | 01474 PaPKS1474  | 2521          | SAT-KS-AT-PT-ACP-ACP-CM-TE | NR-PKS      | AN6448.2, 40%;            |
| 6          | 00029 PaPKS0029  | 2684          | SAT-KS-AT-PT-ACP-CM-R      | NR-PKS      | ATEG_07661, 58%;          |
| 7          | 01432 PaPKS1432  | 2108          | SAT-KS-AT-DH-ACP-TE        | NR-PKS      | AFLA_112840, 87%          |
| 8          | 00990 PaPKS0990  | 2575          | A-ACP-KS-AT-DH-KR-ACP-R    | PR-PKS/NRPS | ChPKS24, 54%              |
| 9          | 00370 PaPKS0370  | 3181          | A-ACP-KS-AT-DH-KR-ACP-R    | PR-PKS/NRPS | ChPKS24, 57%              |
| 10         | 00002 PaPKS0002  | 2469          | KS-AT-DH-CM-ER-KR-ACP      | HR-PKS      | PMAA_001080, 42%          |
| 11         | 00148 PaPKS0148  | 1737          | KS-AT-DH-KR-ACP            | PR-PKS      | Pc22g08170, 93%           |
| 12         | 00861 PaPKS0861  | 3106          | KS-AT-DH-CM-ER-KR-ACP      | HR-PKS      | Pc13g08690, 88%           |
| 13         | 01385 PaPKS1385  | 2181          | KS-AT-DH-CM-KR             | HR-PKS      | AN1784, 50%               |
| 14         | 00181 PaPKS0181  | 2980          | KS-AT-DH-CM-KR-ACP-C       | HR-PKS      | ACLA_055680, 67%          |
| 15         | 00107 PaPKS0107  | 2349          | KS-AT-DH-ER-KR-ACP         | HR-PKS      | Pc16g03800, 95%           |
| 16         | 00876 PaPKS0876  | 2793          | KS-AT-DH-CM-ER-KR-ACP      | HR-PKS      | ATEG_06056, 71%           |
| 17         | 00275 PaPKS0275  | 2474          | KS-AT-DH-CM-ER-KR-ACP      | HR-PKS      | Pc16g11480, 83%           |
| 18         | 00891 PaPKS0891  | 2432          | KS-AT-DH-CM-ER-KR-ACP      | HR-PKS      | FG01790, 42%              |
| 19         | 00927 PaPKS0927  | 2347          | KS-AT-DH-CM-ER-KR-ACP      | HR-PKS      | Pc12g11530, 86%           |
| 20         | 00403 PaPKS0403  | 2582          | KS-AT-DH-CM-ER-KR-ACP      | HR-PKS      | Pc13g04470, 88%           |
| 21         | 00150 PaPKS0150  | 2510          | KS-AT-DH-CM-ER-KR-ACP      | HR-PKS      | PODANSg7686, 62%          |
| 22         | 00817 PaPKS0817  | 2665          | KS-AT-DH-ER-KR-ACP         | HR-PKS      | AN2035, 62%               |
| 23         | 00430 PaPKS0430  | 3014          | KS-AT-DH-CM-ER-KR-ACP-TE   | HR-PKS      | Pc22g23750, 92%           |
| 24         | 01084 PaPKS1084  | 2442          | KS-AT-DH-CM-ER-KR-ACP      | HR-PKS      | NFIA_062550, 47%          |
| 25         | 00591 PaPKS0591  | 2457          | KS-AT-DH-CM-KR-ACP         | HR-PKS      | Pc12g05590, 87%           |
| 26         | 00681 PaPKS0681  | 2724          | KS-AT-DH-CM-ER-KR-ACP      | HR-PKS      | ACLA_002670, 66%          |
| 27         | 00337 PaPKS0337a | 2527          | KS-AT-DH-ER-KR-ACP         | HR-PKS      | SQTKS, 44%                |
| 28         | 00337 PaPKS0337b | 4077          | KS-AT-DH-CM-KR-ACP-C-A-T-R | HR-PKS/NRPS | ACLA_078660, 43%          |
| 29         | 00993 PaPKS0993  | 3974          | KS-AT-DH-CM-KR-ACP-C-A-T-R | HR-PKS/NRPS | Pc14g00080, 87%           |
| 30         | 00310 PaPKS0310  | 3927          | KS-AT-DH-CM-KR-ACP-C-A-T-R | HR-PKS/NRPS | ACLA_077660, 39%          |
| 31         | 00033 PaPKS0033  | 157           | KS-AT(truncated)           | HR-PKS/NRPS | CheA, 88%                 |

Abbreviations for functional domains: SAT – starter unit acyltransferase, KS – ketosynthase, AT – acyltransferase, PT – product template, ACP – acyl carrier protein, TE – thioesterase, R – reductase, CM – C-methyltransferase, DH – dehydratase, ER – enoylreductase, KR, ketoreductase, C – condensation, A – adenylation, T – thiolation.

**Table S2.** List of primers used in this study.

| Primer Name               | Sequence                                    | Application                                                                                                                      |
|---------------------------|---------------------------------------------|----------------------------------------------------------------------------------------------------------------------------------|
| 274PKS-KO-P1              | tcgagcaatgaagaaagctc                        | fusion PCR of <i>vrtA</i> deletion cassette, $\Delta$ <i>vrtA</i> mutant PCR screening                                           |
| 274PKS-KO-P2              | ctgcctgttacgttatggct                        | fusion PCR of <i>vrtA</i> deletion cassette                                                                                      |
| 274PKSbar-KO-P3           | tgcccgtcaccgagatttagg-atggcctcgtatgcagtcac  | fusion PCR of <i>vrtA</i> deletion cassette                                                                                      |
| 274PKSbar-KO-P4           | tcaatatcatcttctgtcgcac-caacgagcaggtgtacagac | fusion PCR of <i>vrtA</i> deletion cassette                                                                                      |
| 274PKS-KO-P5              | cacgtgctgtgaccggttag                        | fusion PCR of <i>vrtA</i> deletion cassette                                                                                      |
| 274PKS-KO-P6              | agcaaggtctatggagtaga                        | fusion PCR of <i>vrtA</i> deletion cassette, $\Delta$ <i>vrtA</i> mutant PCR screening                                           |
| 880PKS-KO-P1              | ctctcgcgatccgagaggct                        | fusion PCR of <i>gsfA</i> deletion cassette, $\Delta$ <i>gsfA</i> mutant PCR screening                                           |
| 880PKS-KO-P2              | ttagcggctcatgtacatga                        | fusion PCR of <i>gsfA</i> deletion cassette                                                                                      |
| 880PKSbar-KO-P3           | tgcccgtcaccgagatttagg-ggatctacatgtgttctcgac | fusion PCR of <i>gsfA</i> deletion cassette                                                                                      |
| 880PKSbar-KO-P4           | tcaatatcatcttctgtcgcac-gaggcagaacttcccgtgt  | fusion PCR of <i>gsfA</i> deletion cassette                                                                                      |
| 880PKS-KO-P5              | acgtcatgagatagaatgtc                        | fusion PCR of <i>gsfA</i> deletion cassette                                                                                      |
| 880PKS-KO-P6              | tgcacgtctcccattactg                         | fusion PCR of <i>gsfA</i> deletion cassette, $\Delta$ <i>gsfA</i> mutant PCR screening                                           |
| bar-F                     | agtaaccatgagcccagaacgac                     | internal primers for PCR screening of double homologous recombination                                                            |
| bar-R                     | agaaaccacgtcatgccagttc                      | internal primers for PCR screening of double homologous recombination                                                            |
| P <sub>trpC</sub> -strt-F | gtcgacagaagatgatattga                       | amplification of P <sub>trpC</sub> : <i>bar</i> resistance cassette from pBARKS1 plasmid                                         |
| bar-stp-R                 | cctaaatctcggtgacgggca                       | amplification of P <sub>trpC</sub> : <i>bar</i> resistance cassette from pBARKS1 plasmid                                         |
| VrtB-F                    | atggctccgtatctacaacat                       | $\Delta$ <i>vrtA</i> mutant PCR screening, amplification of template for DIG-labeled probe ( $\Delta$ <i>vrtA</i> Southern blot) |
| VrtB-R                    | tcaattctgcgttgcccact                        | amplification of template for DIG-labeled probe ( $\Delta$ <i>vrtA</i> Southern blot)                                            |
| GsfI-F                    | atggcgattcctcaatcttgt                       | $\Delta$ <i>gsfA</i> mutant PCR screening, amplification template for DIG-labeled probe ( $\Delta$ <i>gsfA</i> Southern blot)    |
| GsfI-R                    | ctacatttggagatcccctgca                      | amplification of template for DIG-labeled probe ( $\Delta$ <i>gsfA</i> Southern blot)                                            |

Note: Primers with name ending with P1 – P6 followed the designation for fusion PCR as described previously (Szewczyk, E., Nayak, T., Oakley, C.E., Edgerton, H., Xiong, Y., Taheri-Talesh, N., Osmani, S.A., and Oakley, B.R. (2007). Fusion PCR and gene targeting in *Aspergillus nidulans*. *Nat Protocols* 1, 3111-3120.)

**Table S3.**  $^{13}\text{C}$  and  $^1\text{H}$  NMR for **3**<sup>a</sup>.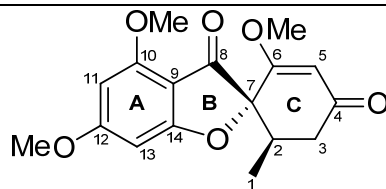

| No. | $^{13}\text{C}$ $\delta$<br>(ppm) | $^1\text{H}$ $\delta$ (ppm)<br>(m, area, $J_{\text{HH}}$ (Hz)) |
|-----|-----------------------------------|----------------------------------------------------------------|
| 1   | 14.6                              | 0.95 (d, 3H, 6.7)                                              |
| 2   | 36.9                              | 2.74 (dq, 1H, 4.7, 6.7, 13.4)                                  |
| 3   | 40.4                              | 2.38 (dd, 1H, 4.7, 16.7)<br>3.04 (dd, 1H, 13.4, 16.7)          |
| 4   | 197.6                             | -                                                              |
| 5   | 105.1                             | 5.52 (s, 1H)                                                   |
| 6   | 170.7                             | -                                                              |
| 7   | 90.2                              | -                                                              |
| 8   | 192.8                             | -                                                              |
| 9   | 104.6                             | -                                                              |
| 10  | 159.4                             | -                                                              |
| 11  | 88.9                              | 6.22 (d, 1H, 1.7)                                              |
| 12  | 176.0                             | -                                                              |
| 13  | 93.7                              | 6.03 (d, 1H, 1.7)                                              |
| 14  | 171.6                             | -                                                              |
| MeO | 56.4                              | 3.89 (s, 3H)                                                   |
| MeO | 56.4                              | 3.89 (s, 3H)                                                   |
| MeO | 56.9                              | 3.61 (s, 3H)                                                   |

<sup>a</sup> Spectra were obtained at 400 MHz for proton and 100 MHz for carbon and were recorded in chloroform-*d*.
